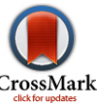

# Linguistic Traces of a Scientific Fraud: The Case of Diederik Stapel

David M. Markowitz<sup>1\*</sup>, Jeffrey T. Hancock<sup>1,2</sup>

**1** Department of Communication, Cornell University, Ithaca, New York, United States of America, **2** Department of Information Science, Cornell University, Ithaca, New York, United States of America

## Abstract

When scientists report false data, does their writing style reflect their deception? In this study, we investigated the linguistic patterns of fraudulent ( $N = 24$ ; 170,008 words) and genuine publications ( $N = 25$ ; 189,705 words) first-authored by social psychologist Diederik Stapel. The analysis revealed that Stapel's fraudulent papers contained linguistic changes in science-related discourse dimensions, including more terms pertaining to methods, investigation, and certainty than his genuine papers. His writing style also matched patterns in other deceptive language, including fewer adjectives in fraudulent publications relative to genuine publications. Using differences in language dimensions we were able to classify Stapel's publications with above chance accuracy. Beyond these discourse dimensions, Stapel included fewer co-authors when reporting fake data than genuine data, although other evidentiary claims (e.g., number of references and experiments) did not differ across the two article types. This research supports recent findings that language cues vary systematically with deception, and that deception can be revealed in fraudulent scientific discourse.

**Citation:** Markowitz DM, Hancock JT (2014) Linguistic Traces of a Scientific Fraud: The Case of Diederik Stapel. PLoS ONE 9(8): e105937. doi:10.1371/journal.pone.0105937

**Editor:** Daniele Fanelli, Université de Montréal, Canada

**Received:** October 4, 2013; **Accepted:** July 29, 2014; **Published:** August 25, 2014

**Copyright:** © 2014 Markowitz and Hancock. This is an open-access article distributed under the terms of the Creative Commons Attribution License, which permits unrestricted use, distribution, and reproduction in any medium, provided the original author and source are credited.

**Funding:** The authors have no support or funding to report.

**Competing Interests:** The authors have declared that no competing interests exist.

\* Email: dmm227@cornell.edu

## Introduction

When a scientist describes research based on fraudulent data how does his or her writing style reveal traces of their deception? The recent attention to scientific fraud [1–4] suggests that misconducts are on the rise across disciplines. While other work has examined statistical irregularities in fraudulent data [5], no research to date has examined linguistic distortions associated with reporting fake data. Although linguistic patterns are an indirect indicator of deception, recent research on language and psychological dynamics suggests that deceptive discourse can be distinguished from truthful discourse in a wide range of contexts [6], from interrogations [7] to fake hotel reviews [8].

Here we examine publications by social psychologist Diederik Stapel, who was found guilty of scientific fraud and whose research program has been comprehensively investigated [9]. Stapel's reports have two important attributes that lend themselves to empirical analysis. First, ground truth has been established for each publication after extensive review [9]. Second, he was highly prolific, authoring over one hundred and twenty papers, fifty-five based on fraudulent data. The investigations into Stapel's misconduct revealed, however, that he frequently allowed others to “discover” and write up the findings from data that he fraudulently generated. We therefore limit our analysis to first-authored papers, in which Stapel was most responsible for the writing, resulting in 24 fraudulent papers producing a corpus of approximately 170,008 words that we compared to a corpus of 25 genuine papers totaling 189,705 words.

Liars have difficulty approximating the appropriate frequency of linguistic dimensions for a given genre, such as the rate of spatial

details in fake hotel reviews [8], the frequency of positive self-descriptions in deceptive online dating profiles [10], or the proportion of extreme positive emotions in false statements from corporate CEOs [11]. Here we investigated the frequency distributions for linguistic dimensions related to the scientific genre across the fake and genuine reports, including words related to causality (e.g., determine, impact), scientific methods (e.g., pattern, procedure), investigations (e.g., feedback, assess), and terms related to scientific reasoning (e.g., interpret, infer). We also considered language features used in describing scientific phenomena, such as quantities (e.g., multiple, enough), terms expressing the degree of relative differences (e.g., amplifiers and diminishers) and words related to certainty (e.g., explicit, certain, definite).

We were also interested in whether the fake reports contained patterns associated with deception in other contexts. Although the science genre limits the frequency of some of the most commonly observed features of deception, such as changes in the use of first-person singular pronouns (e.g. I, my) [12–14], there are several language dimensions that may still be relevant to investigate. Emotion terms (e.g., benefit, dislike) are often modified in deceptive language as they can reveal psychological dynamics [6,14]. Negative affect, for example, can reflect “leakage cues” of anxiety around the deception, while positive affect can result from duping delight or a persuasion strategy to “sell” something as more desirable than it is [10,14–16]. Defensiveness associated with deception can result in increased negations (e.g., nor, not) [10,13], while discrepancy terms (e.g., could, should) serve to distract an audience from the truth [14]. Research on deception and memory reveals that explanations of fabricated events tend to be less

**Table 1.** Frequencies and Percentages of Language Categories Across Stapel's Publications.

| Discourse Category             | Word Count:                  | Fraudulent |      | Genuine   |       | LLR       |
|--------------------------------|------------------------------|------------|------|-----------|-------|-----------|
|                                |                              | 170,008    |      | 189,705   |       |           |
| Science-related                | Example                      | Frequency  | %    | Frequency | %     | LLR       |
| Means and methods              | pattern, procedure           | 822        | 0.48 | 576       | 0.30  | 74.68**** |
| Certainty                      | explicit, precise            | 840        | 0.49 | 646       | 0.34  | 51.13**** |
| Investigation                  | feedback, research, assess   | 1,329      | 0.78 | 1,265     | 0.67  | 16.38**** |
| Amplifiers                     | more, extreme, profoundly    | 1,192      | 0.70 | 1,125     | 0.59  | 16.24**** |
| Diminishers                    | less, somewhat, merely       | 202        | 0.12 | 312       | 0.16  | 13.21***  |
| Reasoning                      | interpret, comprehend        | 787        | 0.46 | 744       | 0.39  | 10.52†    |
| Quantities                     | multiple, general, enough    | 703        | 0.41 | 839       | 0.44  | 1.73      |
| Cause and effect/connection    | determine, result, attribute | 4,452      | 2.62 | 5,101     | 2.69  | 1.67      |
| Deception-related              |                              |            |      |           |       |           |
| Emotional states and processes | affective, mood              | 256        | 0.15 | 133       | 0.07  | 54.22**** |
| Adjectives                     | cooperative, difficult       | 16,535     | 9.73 | 19,314    | 10.18 | 18.65**** |
| Negations                      | no, not, nor                 | 1,352      | 0.80 | 1,608     | 0.85  | 2.99      |
| Conjunctions                   | and, or                      | 5,536      | 3.26 | 6,025     | 3.18  | 1.80      |
| Discrepancies                  | could, would, should         | 1,813      | 1.07 | 2,053     | 1.08  | 0.21      |

Note: Table 1 is organized by descending LLR. LLR values of 10.83 and 15.13 equate to \*\*\* $p < .001$  and \*\*\*\* $p < .0001$ , † $p < .01$  respectively [20]. Wmatrix categories were renamed for clarity: Amplifiers = "Degree: Boosters," Reasoning = "Understanding," Certainty = "Detailed," Discrepancies = "Modal Auxiliary Verbs," and Negations = "Negative."

doi:10.1371/journal.pone.0105937.t001

descriptive than real events [17], suggesting that fraudulent papers should contain less detail (e.g., adjectives) than genuine papers. Finally, deceptive statements often contain less complex discourse structures than truths because of the difficulty associated with fabricating narratives. As such, we expect evidence of less complex sentences (e.g., fewer conjunctions) in fraudulent papers [12,14].

## Method

Three committees reviewed all of Stapel's publications and issued a detailed account of his transgressions [9]. The committees established indisputable fraud in 55 publications after obtaining raw data, re-analyzing studies, and interviewing Stapel, while 70 publications were established as genuine. They report, however, no evidence of fraud by Stapel's collaborators. Our analysis therefore focuses only on Stapel's first-authored publications in which there is established evidence of fraud. The resulting corpus, after excluding papers not written in English, yielded 24 fraudulent publications (170,008 words) and 25 genuine publications (189,705 words) (see Table S1 for articles included in the analysis). Consistent with principles of scientific transparency and based on the recommendation by Simmons and colleagues [18], the fraudulent and genuine Stapel files are available from the authors.

To analyze writing style we applied a corpus analytic method using Wmatrix [19,20], an approach that is commonly used for corpus comparisons (e.g., [21,22]). Wmatrix is a tool that provides standard corpus linguistics analytics, including word frequency lists and analyses of major grammatical categories and semantic domains. Wmatrix tags parts of speech (e.g., adjectives, nouns) in relation to other words within the context of a sentence (e.g., the word "store" can take the noun form as a retail establishment or a verb, as the act of supplying an object for future use). Semantic content in Wmatrix is based on McArthur's Longman Lexicon of Contemporary English [23] and references 21 major discourse fields including psychological actions, states, and processes, science

and technology, and language and communication (see [20] for the full semantic tagset). Wmatrix has a classification accuracy rate of 96–97% for part of speech and 92% for semantic content in English [19].

Wmatrix provides the frequency and relative percentage of words that are tagged in each corpus and computes pairwise differences based on a log-likelihood ratio (LLR) [20]. The LLR statistical measure quantifies the difference in frequency across the two corpora on the linguistic parameter of interest. In our analysis we use a conservative cut-off of  $p < .001$  in order to control for multiple LLR computations (see [24]).

The fraudulent papers were collated to create one file containing all of Stapel's fraudulent writing and the genuine papers were collated into a second file containing all of his genuine writing. Only text from the main body comprising the Introduction through Discussion sections (excluding section titles, figures, tables, and legends) was included in the two corpora. In order for Wmatrix to accurately calculate word counts, symbols common to science writing (e.g., &, <, >, [ ]) were replaced with characters according to Wmatrix's preprocessing guidelines [25].

## Results

### Science-related Discourse

We first examined dimensions related to scientific writing given that liars struggle to approximate the appropriate frequency of genre-related discourse [8,10,11]. As described in Table 1, Stapel's fraudulent writing featured significantly higher rates of terms related to scientific methods and empirical investigation compared to his genuine writing, while cause and effect terminology and quantities did not differ across the two corpora. These data suggest that fraudulent papers involved the overproduction of scientific discourse, such as terms related to explaining data and research processes.

Stapel also used words to describe comparative differences uniquely in his fraudulent articles relative to genuine articles, with more amplifying terms (e.g., extreme, exceptionally, vastly) but fewer diminishers (e.g., somewhat, partly, slightly), suggesting that Stapel linguistically enhanced his findings when reporting on fake data and avoided words that would downplay the results. Further, Stapel used more terms related to certainty in fraudulent papers, suggesting that the fraudulent papers were written with higher levels of confidence or precision when describing the results.

### Deception-related Patterns

Did the discourse in fraudulent articles display patterns similar to deception-related work from other contexts? The results here are more mixed. An important finding in deception research is lower levels of detail in deceptive relative to truthful statements [12,17,26,27] and our data are consistent with this pattern. There were significantly fewer adjectives (e.g., dominant, agreeable, meaningful) in Stapel's fraudulent papers compared to genuine papers, suggesting that papers based on fake data were less descriptive overall than those based on genuine data.

Several dimensions often observed to be diagnostic in the deception literature, however, were not different across the corpora. Stapel's fraudulent publications did not contain more negations (e.g., nor, not), discrepancies (e.g., should, would, could), or fewer conjunctions (e.g., and, or, but).

Finally, consistent with other deception research, fraudulent publications used more words related to emotional actions, states and processes, suggesting that Stapel's fraudulent papers were more affect-laden. Prior work has found that liars express more negative emotions due to non-conscious leakage of anxiety [12,14,15]. An examination of the affect terms in Stapel's writing revealed, however, that none were related to anxiety but were instead concerned with psychological processes of the participants, such as "affect" "mood" or "emotional," suggesting that the increased rate of affect terms in fraudulent papers was not an indicator of leakage cues for Stapel.

A second possibility is that the overproduction of affect terms was related to persuasion, perhaps using affective processes to make the findings more exciting. This would be consistent with other deception research, in which affect terms are used to exaggerate or overvalue something, such as the elegance of a hotel [8] or the attractiveness of an online dater [10]. An alternative and simpler explanation is that more of the fraudulent articles focused on affect-related topics, an important subject in social psychology. An analysis of the abstracts and keywords, however, revealed no significant difference in affect-related terms in these summaries, suggesting that the emotion effect was not due to topical differences across the corpora.

### Co-Authors, References and Reported Experiments

In addition to writing style, we examined co-author differences between Stapel's fraudulent and genuine first-authored publications. The number of authors varied significantly across article type,  $t(45) = 2.03$ ,  $p = .048$ , with fraudulent papers having fewer authors ( $M = 2.00$ ,  $SD = 0.42$ ) than genuine papers ( $M = 2.28$ ,  $SD = 0.54$ ). We find this result even as fraudulent and genuine articles did not statistically differ in the number of experiments and references per paper. This finding is consistent with research on deception and group size [28], as it is typically easier to deceive in the presence of a smaller group than a larger one [6].

### Text Classification Accuracy

To measure the predictive success of our language features from Table 1, we used a standard leave-one-out cross validation

technique across each individual publication (see Table 2). The model fit well [ $\chi^2 = 29.30$ ,  $p = .006$ ] and accurately classified 71.4% of Stapel's papers, resulting in a significant increase above chance (51%). Given this improvement, it is tempting to consider linguistic analysis as a forensic tool for identifying fraudulent science. This does not seem feasible, at least for now, for several reasons. First, nearly thirty percent of Stapel's publications would be misclassified, with 28% of the articles incorrectly classified as fraudulent while 29% of the fraudulent articles would be missed. Second, this analysis is based only on Stapel's research program and it is unclear how models based on his discourse style would generalize to other authors or to other disciplines.

### Discussion

The present study is the first to demonstrate that the deception of a fraudulent scientist is reflected in writing style. We observed significant differences in several dimensions of Stapel's writing that reflect changes in his writing style when reporting on fake data relative to genuine data. The patterns are impressive given that the only difference between the two corpora was the fact that they reported on fraudulent data. In many other respects they were identical, including each being written by the same first author and each focusing on topics within social psychology.

The most distinct change was Stapel's use of linguistic dimensions related to scientific writing in his fraudulent work. Stapel overproduced terms related to several important science genre dimensions, including words related to methods and investigation, suggesting that he had difficulty approximating the appropriate frequency of these dimensions when reporting on fake data. Although Stapel overproduced words related to methods and investigation, it was not the case that the fraudulent papers were more descriptive; in fact, he included substantially fewer adjectives in his fraudulent articles. Overall, Stapel used nearly three thousand fewer adjectives in his fake papers than in his genuine papers. This observation is consistent with deception research related to Reality Monitoring [26,27], which asserts that descriptive recall of real experiences are more sensory and contextually driven, while recall of imagined experiences tend to reflect cognitions, rationalizations, and fewer detailed descriptions about perceptual information [6,29]. Given that Stapel generally did not just manipulate datasets he collected, but instead fabricated them without ever collecting any information from participants, his descriptions should resemble recall of imagined experiences rather than modifications of real ones.

A second pattern related to the science genre was Stapel's use of more language to emphasize the importance and relative differences of the results, but fewer words to downplay or hedge empirical findings. In particular, we observed significantly higher rates of linguistic amplifiers that express degrees of difference but

**Table 2.** Cross-Validated Classification Accuracy Across Stapel's Fraudulent and Genuine Publications.

|                         | Predicted  |         | Classification Accuracy |
|-------------------------|------------|---------|-------------------------|
|                         | Fraudulent | Genuine |                         |
| Fraudulent ( $N = 24$ ) | 17         | 7       | 70.8%                   |
| Genuine ( $N = 25$ )    | 7          | 18      | 72.0%                   |
|                         | Overall:   |         | 71.4%                   |

doi:10.1371/journal.pone.0105937.t002

lower rates of diminishers that attenuate or equivocate descriptions of results. Stapel also wrote with more certainty when describing his fake data, using nearly one-third more certainty terms than he did in the genuine articles. Words such as “profoundly,” “extremely,” and “considerably” frame the findings as having a substantial and dramatic impact. By describing false data with words that enhanced the results, Stapel presumably attempted to emphasize the novelty and strength of his findings, which ended up being “too good to be true” [9]. This pattern of language is also consistent with other forms of deception that involve persuading readers about quality, such as fake hotel reviews that include too many superlatives relative to real reviews [8].

Our study suggests that some traditional deception indicators, negations, conjunctions and discrepancies [10,12–15], were not indicative of Stapel’s fraud. There are several possible reasons for why these deception patterns did not emerge here. First, the highly formalized science genre restricts some linguistic dimensions that have been observed in other deception contexts, such as first-person singular pronouns, and this may have made traditional markers of deception less relevant for the science context. Second, science writing is planned and highly edited. In contrast, most deception research involves spoken statements or conversations, in which the lies are produced extemporaneously [30]. Cues such as reduced discourse complexity, therefore, may not be important in science writing because it is produced asynchronously and with the ability to revise. Indeed, research examining financial statements written by corporate officers found that fraudulent statements tend to have more complex discourse structures, such as longer words and sentences [31,32], rather than less complex discourse structures. Finally, our analysis considered only one author’s research program. Stapel was a prolific liar and his proficiency may have attenuated any guilt or anxiety about writing false research or any cognitive challenges that may produce cues in other deception contexts.

## References

1. Fanelli D (2009) How many scientists fabricate and falsify research? A systematic review and meta-analysis of survey data. *PLoS One* 4: 1–11. doi: 10.1371/journal.pone.0005738
2. Fang FC, Steen RG, Casadevall A (2012) Misconduct accounts for the majority of retracted scientific publications. *Proc Natl Acad Sci U S A* 109: 17028–17033. doi: 10.1073/pnas.1212247109
3. Cooper J (2013) On fraud, deceit and ethics. *J Exp Soc Psychol* 49: 314. doi: http://dx.doi.org/10.1016/j.jesp.2012.12.006
4. Yong E (2012) Nobel laureate challenges psychologists to clean up their act. Available: <http://www.nature.com/news/nobel-laureate-challenges-psychologists-to-clean-up-their-act-1.11535#/> Accessed 2013 Jul 20.
5. Simonsohn U (2013) Just post it: The lesson from two cases of fabricated data detected by statistics alone. *Psychol Sci* 24: 1875–1888. doi: 10.1177/0956797613480366
6. Vrij A (2008) Detecting lies and deceit: Pitfalls and opportunities. West Sussex: John Wiley & Sons Ltd.
7. Porter S, Yuille JC (1996) The language of deceit: An investigation of the verbal clues to deception in the interrogation context. *Law Hum Behav* 20: 443–458. doi: 10.1007/BF01498980
8. Ott M, Choi Y, Cardie C, Hancock JT (2011) Finding deceptive online spam by any stretch of the imagination. 49th Annual Meeting of the Association for Computational Linguistics. Portland, Oregon.
9. Levelt, Noort, Drenth Committees (November, 2012) Flawed science: The fraudulent research practices of social psychologist Diederik Stapel. Available: <https://www.commissielevelt.nl>. Accessed 2013 May 7.
10. Toma CL, Hancock JT (2012) What lies beneath: The linguistic traces of deception in online dating profiles. *J Commun* 62: 78–97. doi: 10.1111/j.1460-2466.2011.01619.x
11. Larcker DF, Zakolyukina AA (2012) Detecting deceptive discussions in conference calls. *J Accounting Res* 50: 495–540. doi: 10.1111/j.1475-679X.2012.00450.x
12. Newman ML, Pennebaker JW, Berry DS, Richards JM (2003) Lying words: Predicting deception from linguistic styles. *Pers Soc Psychol Bull* 29: 665–675. doi: 10.1177/0146167203251529
13. Hancock JT, Curry LE, Goorha S, Woodworth M (2008) On lying and being lied to: A linguistic analysis of deception in computer-mediated communication. *Discourse Process* 45: 1–23. doi: 10.1080/01638530701739181
14. Pennebaker JW (2011) *The secret life of pronouns: What our words say about us*. London: Bloomsbury Press.
15. Ekman P (2001) *Telling lies: Clues to deceit in the marketplace, politics, and marriage*. New York: W.W. Norton & Company, Inc.
16. Zhou L, Burgoon JK, Nunamaker JF, Twitchell D (2004) Automating linguistics-based cues for detecting deception in text-based asynchronous computer-mediated communication. *Group Decis Negot* 13: 81–106. doi: 10.1023/B:GRUP.0000011944.62889.6f
17. Sporer SL (2009) Reality monitoring and detection of deception. In: Granhag PA & Stromwell LA, editors. *The detection of deception in forensic contexts*. Cambridge: Cambridge University Press. pp. 64–102.
18. Simmons JP, Nelson LD, Simonsohn U (2011) False-positive psychology: Undisclosed flexibility in data collection and analysis allows presenting anything as significant. *Psychol Sci* 22: 1359–1366. doi: 10.1177/0956797611417632
19. Rayson P (2008) From key words to key semantic domains. *Int J Corpus Ling* 13: 519–549. doi: 10.1075/ijcl.13.4.06ray
20. Rayson P (2003) *Matrix: A statistical method and software tool for linguistic analysis through corpus comparison*. United Kingdom: Lancaster University (PhD Thesis).
21. Perez MC (2010) Learning from Obama and Clinton: Using individuals’ corpora in the language classroom. In: Jaen MM, Perez MC, Valverde FS, editors. *Exploring new paths in language pedagogy: Lexis and corpus-based language teaching*. London: Equinox Publishing. pp. 191–212.
22. Ali AM (2007) Semantic fields of problem in business English: Malaysian and British journalistic business texts. *Corpora* 2: 211–239. doi: 10.3366/cor.2007.2.2.211
23. McArthur T (1985) Longman lexicon of contemporary English. In: Quirk R, Greenbaum S, Leech G, Svartvik J, editors. *Longman*.
24. Mehl M, Gill AJ (2010) Computerized content analysis. In: Gosling S & Johnson, J., editors. *Advanced methods for behavioral research on the internet*. Washington DC: American Psychological Association Publications.
25. Rayson P (2014) CLAWS input/output format guidelines. Lancaster University.

While generalizing to other cases of scientific fraud is important, for this initial exploration into the language of scientific fraud, having a single author whose work had been closely investigated for fraud provided an important degree of control across publication types. Despite focusing on Stapel’s fraud, our results also extend findings from the Levelt, Noort, and Drenth Committees [9] by showing that Stapel left traces of fraud in his writing. These traces are consistent with other work indicating that language cues are important in deception detection. It is impressive to find these patterns in scientific discourse given how often publications are edited and controlled by authorship teams. These factors suggest that looking at a broader set of authors and fraudulent research papers [2,33] may be fruitful for illuminating deceptive scientific language across disciplines.

## Supporting Information

### Table S1 Fraudulent and Genuine Stapel Articles in the Analysis.

(XLSX)

## Acknowledgments

We thank Cindy Chung, Melissa Ferguson, Stephen Porter, Jonathan Schuldt, Jessie Taft, and Michael Woodworth for comments on an earlier version of this manuscript.

## Author Contributions

Conceived and designed the experiments: DMM JTH. Performed the experiments: DMM JTH. Analyzed the data: DMM JTH. Contributed reagents/materials/analysis tools: DMM JTH. Wrote the paper: DMM JTH.

26. Johnson MK, Raye CL (1981) Reality monitoring. *Psychol Rev* 88: 67–85. doi: 10.1037/0033-295X.88.1.67
27. Vrij A (2008) Detection of deception: Reality monitoring. In: Cutler, BL, editor. *Encyclopedia of psychology and law*. SAGE Publications, Inc. Thousand Oaks, CA: SAGE Publications, Inc.
28. Zhou L, Zhang D (2006) A comparison of deception behavior in dyad and triadic group decision making in synchronous computer-mediated communication. *Small Group Research* 37: 140–164. doi: 10.1177/1046496405285125
29. Bond GD, Lee AY (2005) Language of lies in prison: Linguistic classification of prisoners' truthful and deceptive natural language. *Appl Cogn Psychol* 19: 313–329. doi: 10.1002/acp.1087
30. Vrij A (2006) Detecting deception. In: Kebbell M, Davies G, editors. *Practical psychology for forensic investigations and prosecutions: Wiley series in psychology of crime, policing, and law*. Chichester: Wiley & Sons. pp. 89–102.
31. Courtis JK (2004) Corporate report obfuscation: artefact or phenomenon? *Br Account Rev* 36: 291–312. doi: 10.1016/j.bar.2004.03.005
32. Courtis JK (1998) Annual report readability variability: tests of the obfuscation hypothesis. *Account Auditing Account J* 11: 459. doi: 10.1108/09513579810231457
33. Grieneisen ML, Zhang M (2012) A comprehensive survey of retracted articles from the scholarly literature. *PLoS One* 7: 1–15. doi: 10.1371/journal.pone.0044118
